# Supplementary material
Source: PubMed Central journal article supplement (PMC3078438)
Supplement: mmc1.pdf [file mmc1.pdf]

A

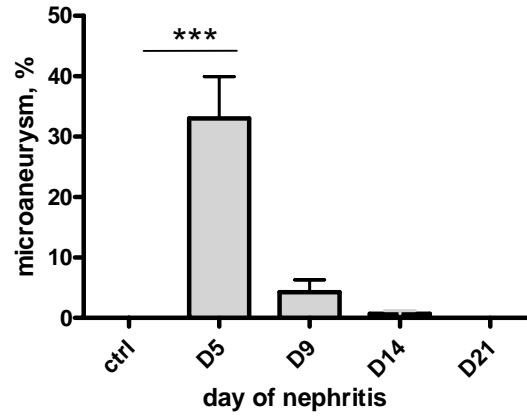

B

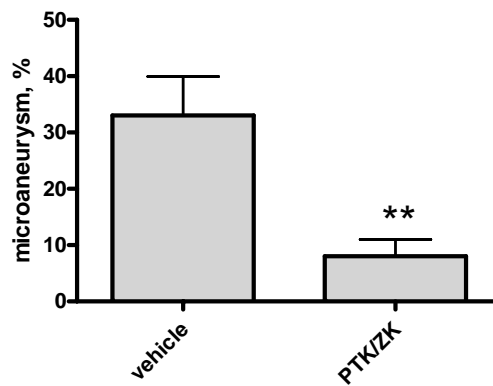

**Supplemental Figure 1**

Appearance of glomeruli with microaneurysms during nephritis after vehicle and PTK/ZK treatment. Nephritis onset is characterized by microaneurysm formation with its peak at day 5. After this time point microaneurysm number gradually decreased (A). Presence of glomeruli with microaneurysms was reduced after PTK/ZK administration at day 5 of nephritis (B). \*\*  $P < 0.01$ , \*\*\*  $P < 0.0001$  versus healthy animals (ctrl, A) or vehicle-treated nephritic animals (B). (n=4)
