# Supplementary material
Source: PubMed Central journal article supplement (PMC3078438)
Supplement: mmc2.pdf [file mmc2.pdf]

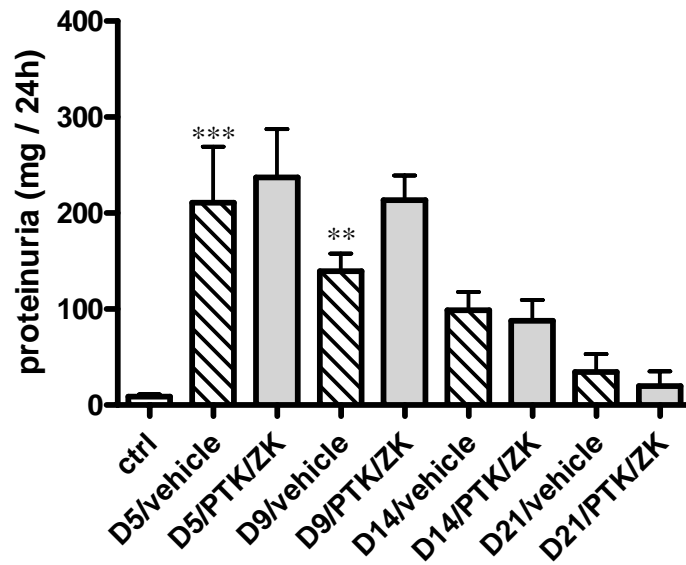

### Supplemental Figure 2

Urinary protein excretion after vehicle and PTK/ZK administration to nephritic rats. Nephritis onset is accompanied by the increase of urinary protein excretion at days 5 and 9, but at days 14 and 21 protein concentration in the urine is comparable with healthy rats. PTK/ZK administration had no effect on proteinuria at any time point during nephritis. \*\*  $P < 0.01$ , \*\*\*  $P < 0.0001$  versus healthy animals (ctrl). (n=6)
